# Supplementary material for: Biochemical impacts of PET microplastics and cadmium on Danio rerio under environmental conditions
Source: Research Square preprint supplement (doi:10.21203/rs.3.rs-7042793/v1), 2025-08-13
Supplement: Supplementary file 1 [file d344e6f9cdcebd40d24dc977.docx]

**Title:** **“Biochemical impacts of PET microplastics and cadmium on *Danio rerio* under environmental conditions.”**

**Supplementary material**

Leslie L. Morales-Espinozaa

Marina Tauche Ferreirab

Cleoni dos Santos Carvalhoc

Paulo Donato Frighettod

Heidi S. Moraes Utsunomiyac

Lino F. Morales-Paredese

Renata Fracácioa*

*a Programa de Pós-graduação em Ciências Ambientais, Instituto de Ciência e Tecnologia - Câmpus de Sorocaba - Universidade Estadual Paulista Júlio de Mesquita Filho (UNESP) Av. Três de Março, 511, CEP 18087-180, Sorocaba, São Paulo, Brazil.*

*b Programa de Pós-graduação PPGBMA, Universidade Federal de São Carlos, Campus Sorocaba, Rodovia Joao Leme dos Santos, km 110, SP-264, CEP 18052-780, Sorocaba, São Paulo, Brazil*

*c Universidade Federal de São Carlos, Campus Sorocaba, Rodovia Joao Leme dos Santos, km 110, SP-264, CEP 18052-780, Sorocaba, São Paulo, Brazil*

*d Instituto Federal São Paulo, Campus Sertãozinho, R. Américo Ambrósio, CEP, 14169-263, Sertãozinho, São Paulo, Brazil*

*e Departamento Académico de Química, Facultad de Ciencias Naturales y Formales, Universidad Nacional de San Agustín de Arequipa, Arequipa 04001, Peru*

Address correspondence to renata.fracacio@unesp.br, Sorocaba - SP, 18087-180, Brazil, telephone +55 15 99729-8227


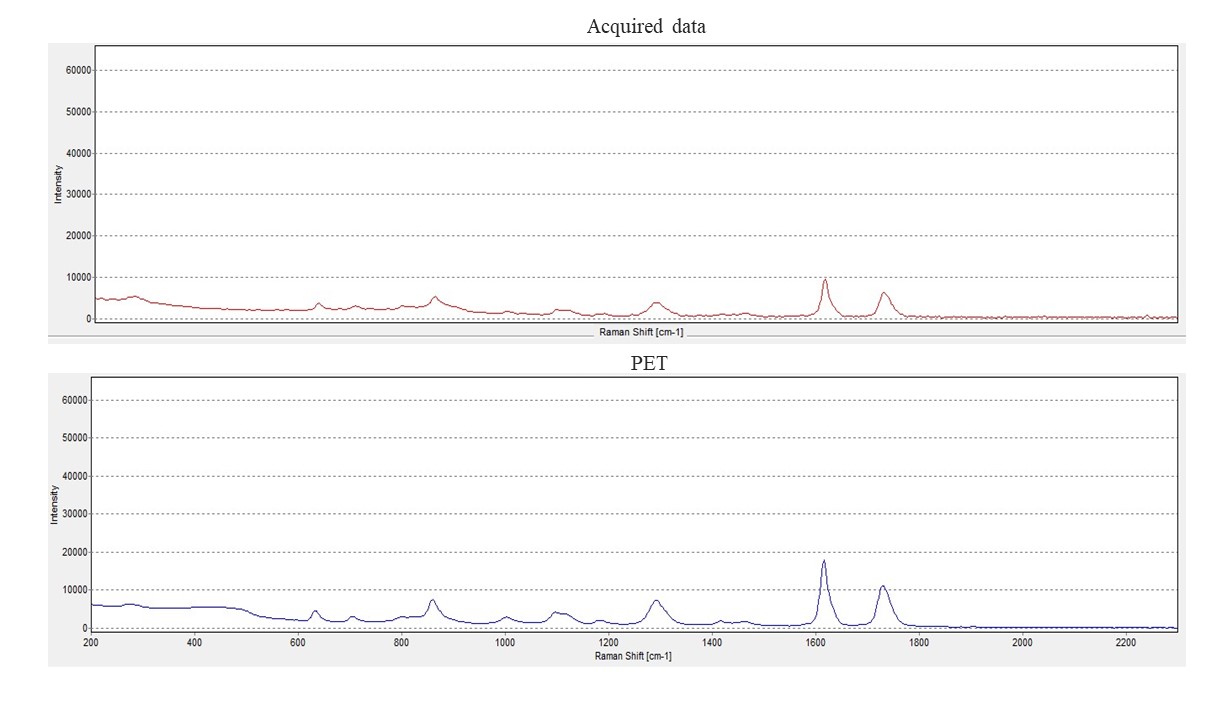


**Figure S1:** (A)Raman spectra for Polyethylene Terephthalate microplastics (PET-MPs) samples and (B) Polyethylene Terephthalate pure pattern. Match data with a HQI of 96.62%

**Table S1:** Water parameters from chronic experiments of different sizes and concentrations of PET-MPs and PET in combination with Cadmium with *Danio rerio.*

| **Water parameters** | **Experiment 1**  **(PET isolated)** | **Experiment 2 (PET+Cd)** |
| --- | --- | --- |
| Temperature (°C) | 25.91±0.01 | 25.89±0.01 |
| pH | 6.85±0.08 | 6.74±0.07 |
| Hardness (mg. L-1 of CaCO3) | 42.87±0.01 | 43.06±0.01 |
| Dissolved oxygen (mg. L-1) | 5.52±0.01 | 6.10±0.01 |
| Condutivity (µS. cm-1) | 182.91±0.05 | 170.31±0.04 |
| Photoperiod (hours of light) | 12 | 12 |

Results are shown as mean ± standard deviation (S.D.).

**Table S2.** Changes in biochemical parameters in zebrafish (*D. rerio*) exposed to different sizes and concentrations of PET-MPs. The number of individuals per treatment was 10.

| **Biochemical Parameters** |  | **Treatments** | | | | |
| --- | --- | --- | --- | --- | --- | --- |
| **Statistic values** | **Control** | **PET-MP 1-1** | **PET-MP 1-2** | **PET-MP 2-1** | **PET-MP 2-2** |
| Proteins  (mg. L-1) | P = 0.195  H = 6.055 | 24.666±2.987 | 22.002±3.451 | 22.763±2.837 | 23.638±2.476 | 22.435±2.074 |
| Glucose  (mg. L-1) | P = <0.001  F = 8.632 | 13.566±3.119**a** | 7.344±1.734**d** | 12.093±2.389**ab** | 7.915±1.836**cd** | 11.211±2.194**abc** |
| Triglycerides  (mg. L-1) | P = 0.130  F = 1.900 | 64.613±12.591 | 61.192±11.208 | 49.590±11.908 | 53.174±9.493 | 59.434±10.996 |
| CP  (nmoles. mg protein-1) | P = <0.001  F = 22.452 | 2.788±0.314**c** | 5.596±0.941**a** | 5.561±0.847**ab** | 4.780±0.719**ab** | 3.659±0.746**c** |
| LDH  (mU. mg protein-1) | P = <0.001  F =15.226 | 0.050±0.009**abc** | 0.015±0.001 | 0.066±0.020**ab** | 0.035±0.010**c** | 0.070±0.020**a** |
| MDH  (mU. mg protein-1) | P = 0.193  H = 6.084 | 0.004±0.003 | 0.004±0.001 | 0.003±0.001 | 0.005±0.001 | 0.004±0.001 |

Results are shown as mean ± standard deviation (S.D.). Lowercase letters represent significant differences (p < 0.05) between different experimental groups. Acronyms of PET-MPs represent different sizes and concentrations, PET-MP 1-1: 300-425 µm and C: 983 particles. L-1; PET-MP 1-2: 300-425 µm and C:330 particles. L-1; PET-MP 2-1: 53-75 µm and C: 983 particles. L-1 and PET-MP 2-2: 53-75 µm and C: 330 particles. L-1.

**Table S3.** Changes in biochemical parameters in zebrafish (*D. rerio*) exposed to PET-MPs in combination with cadmium. The number of individuals per treatment was 8.

| **Biochemical Parameters** |  | **Treatments** | | | |
| --- | --- | --- | --- | --- | --- |
| **Statistic values** | **Control** | **Cd** | **PET-MP 2-2** | **PET-MP 2-2+ Cd** |
| Proteins  (mg. L-1) | P = 0.966  F = 0.0874 | 16.554±2.673 | 16.801±1.703 | 16.272±2.539 | 16.794±1.883 |
| Glucose  (mg. L-1) | P = 0.059  H = 2.941 | 7.631±1.554 | 7.335±5.728 | 5.379±5.728 | 8.491±5.728 |
| Triglycerides  (mg. L-1) | P = 0.168  H = 1.847 | 27.117±1.554 | 26.293±1.578 | 35.603±1.106 | 35.233±2.615 |
| CP  (nmoles. mg protein-1) | P = <0.001  F = 8.572 | 2.333±0.555**cb** | 2.622±0.607 **ab** | 1.700±0.343**bc** | 3.508±0.714**a** |
| LDH  (mU. mg protein-1) | P = 0.003  H = 14.212 | 0.037±0.031**ab** | 0.006±0.002**abc** | 0.066±0.010**a** | 0.001±0.000**bc** |
| MDH  (mU. mg protein-1) | P = <0.001  F = 13.196 | 0.007±0.002**bc** | 0.019±0.004**a** | 0.009±0.003**bc** | 0.013±0.003**ab** |

Results are shown as mean ± standard deviation (S.D.). Lowercase letters represent significant differences (p < 0.05) between different experimental groups. Acronyms of PET-MPs represent different sizes and concentrations, PET-MP 2-2: 53-75 µm and C: 330 particles. L-1, Cd: Cadmium, PET-MP 2-2+ Cd: 53-75 µm, and C: 330 particles. L-1 in combination of Cadmium.
